# Supplementary material
Source: PubMed Central journal article supplement (PMC3729210)
Supplement: NIHMS482184-supplement-02.pdf [file NIHMS482184-supplement-02.pdf]

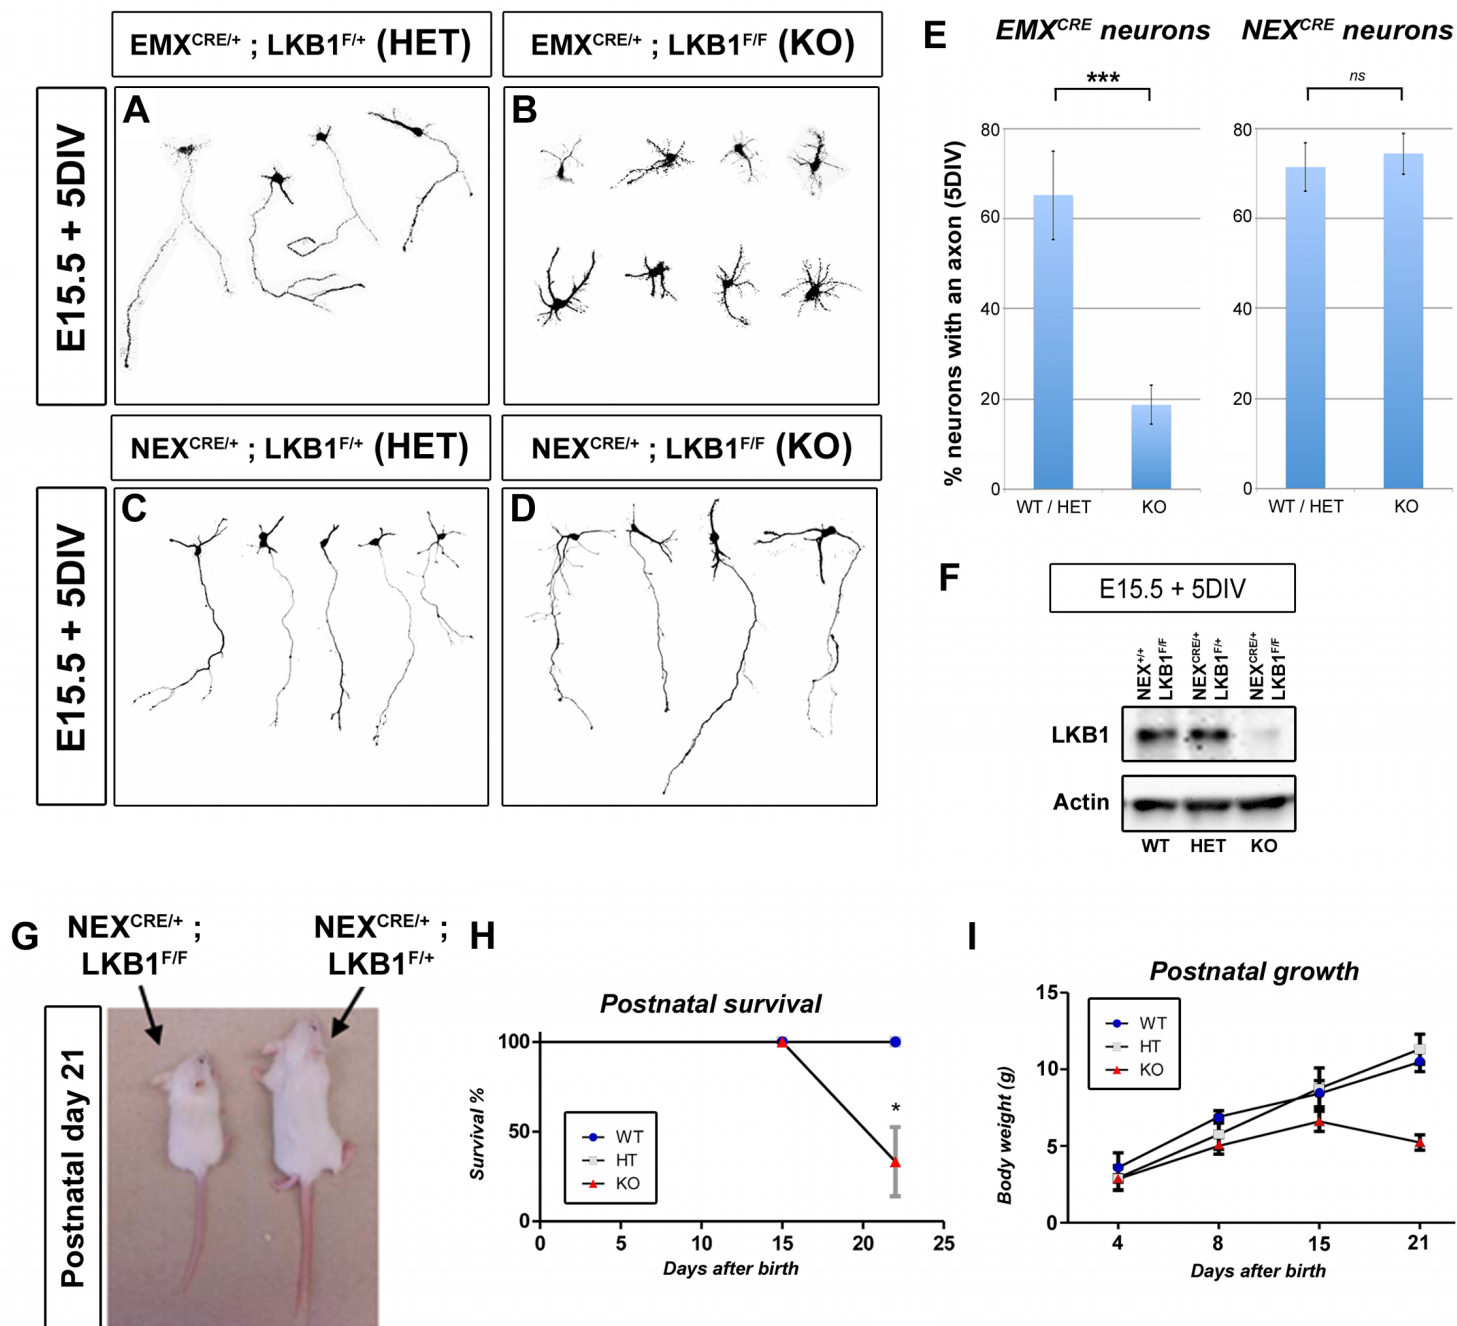

Figure S1  
Courchet, Lewis et al

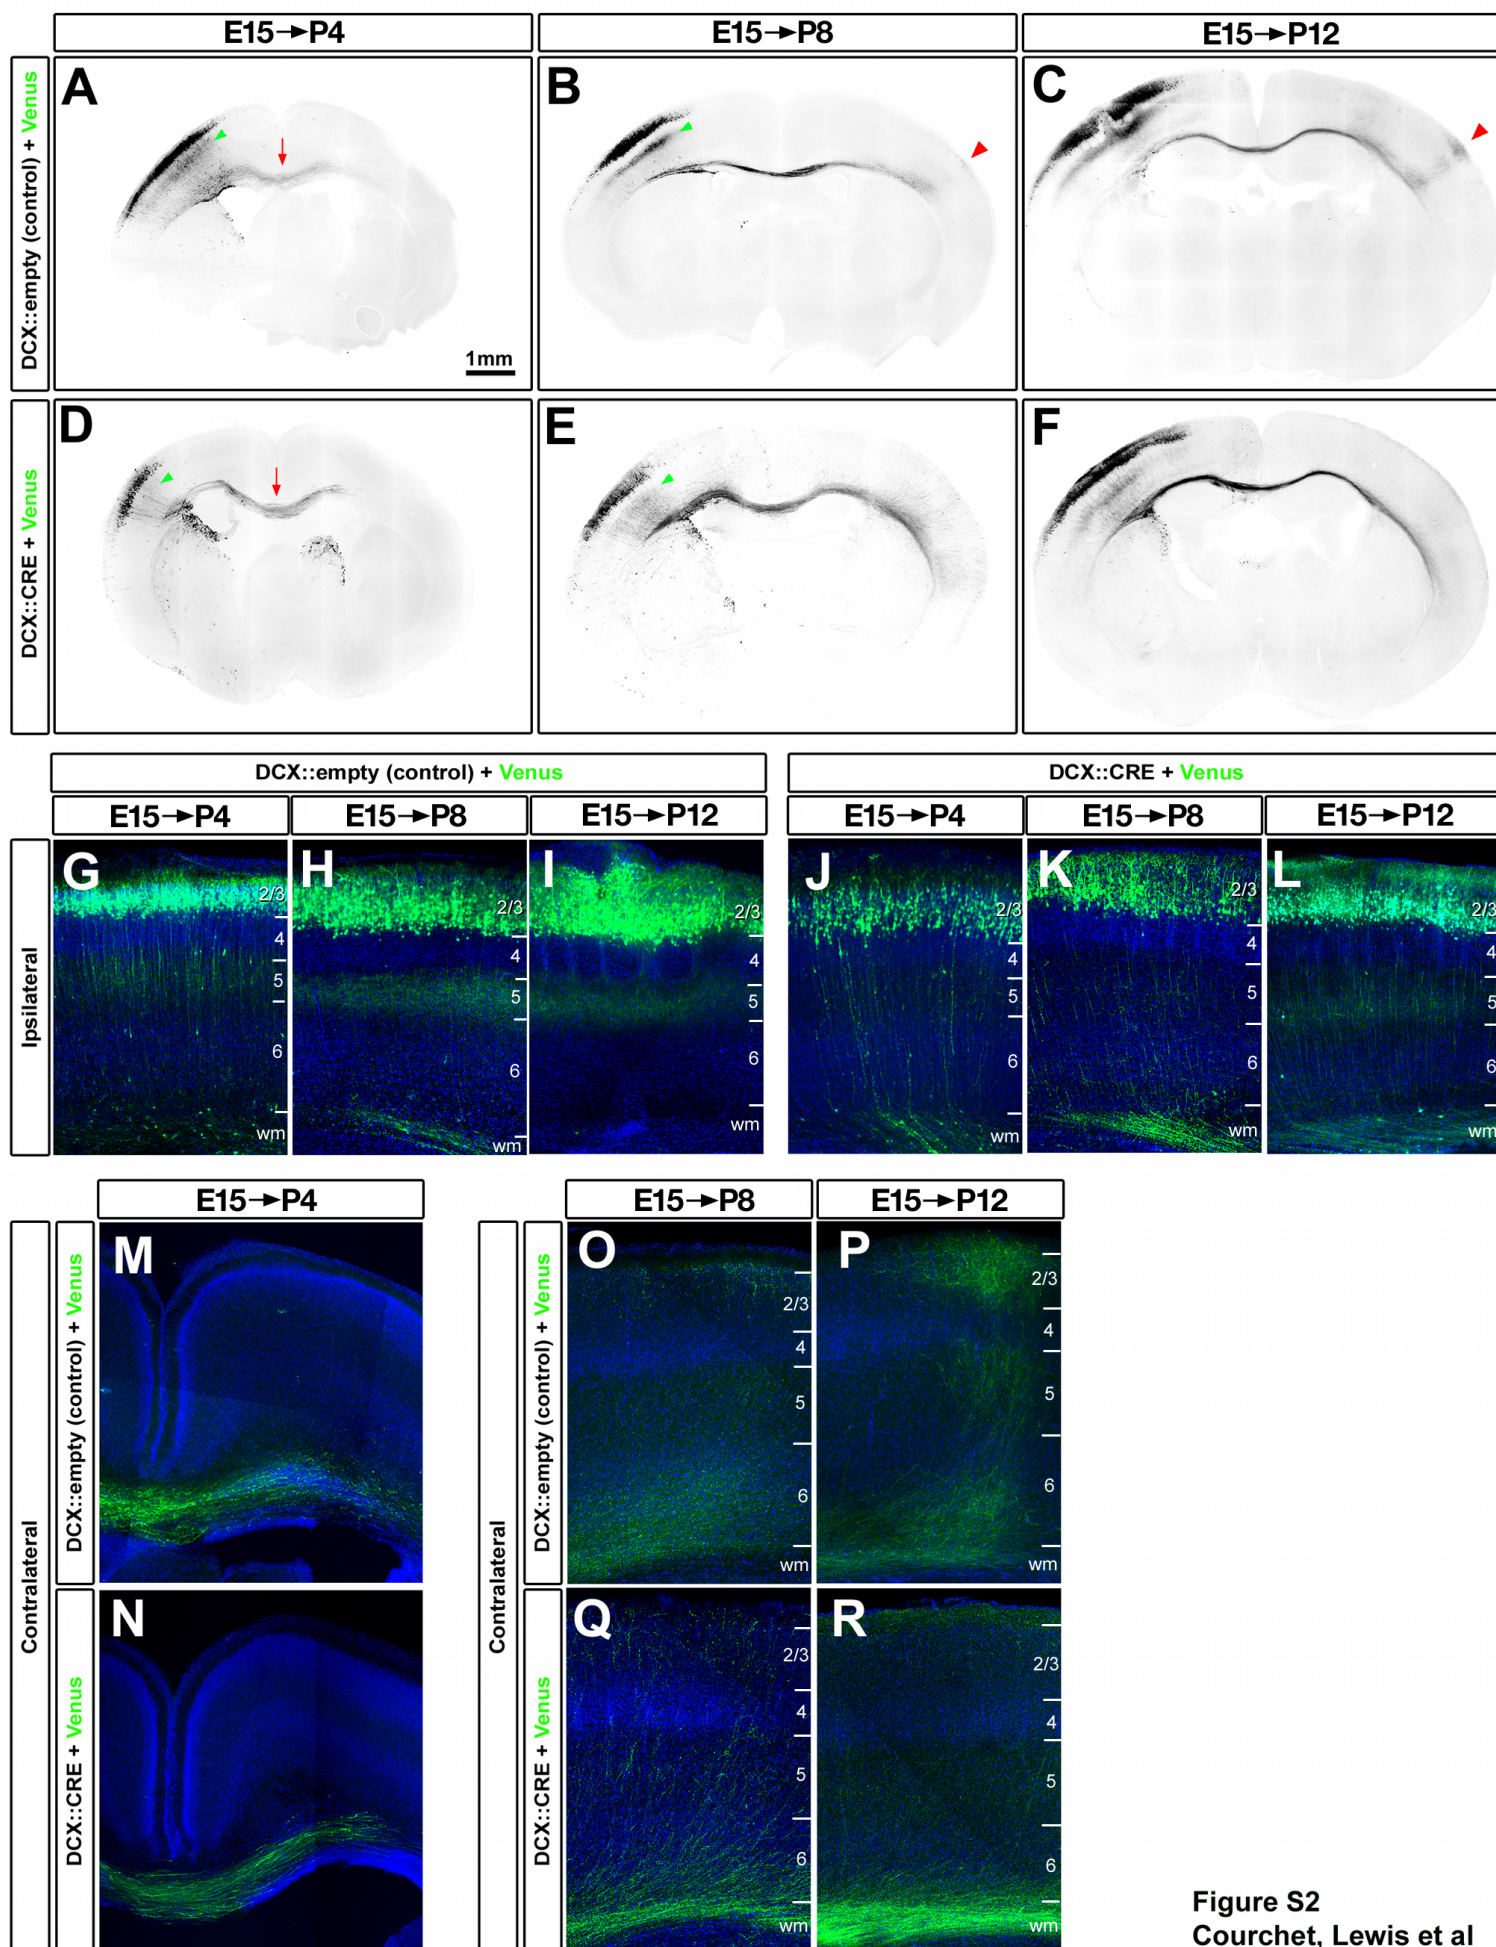

Figure S2  
Courchet, Lewis et al

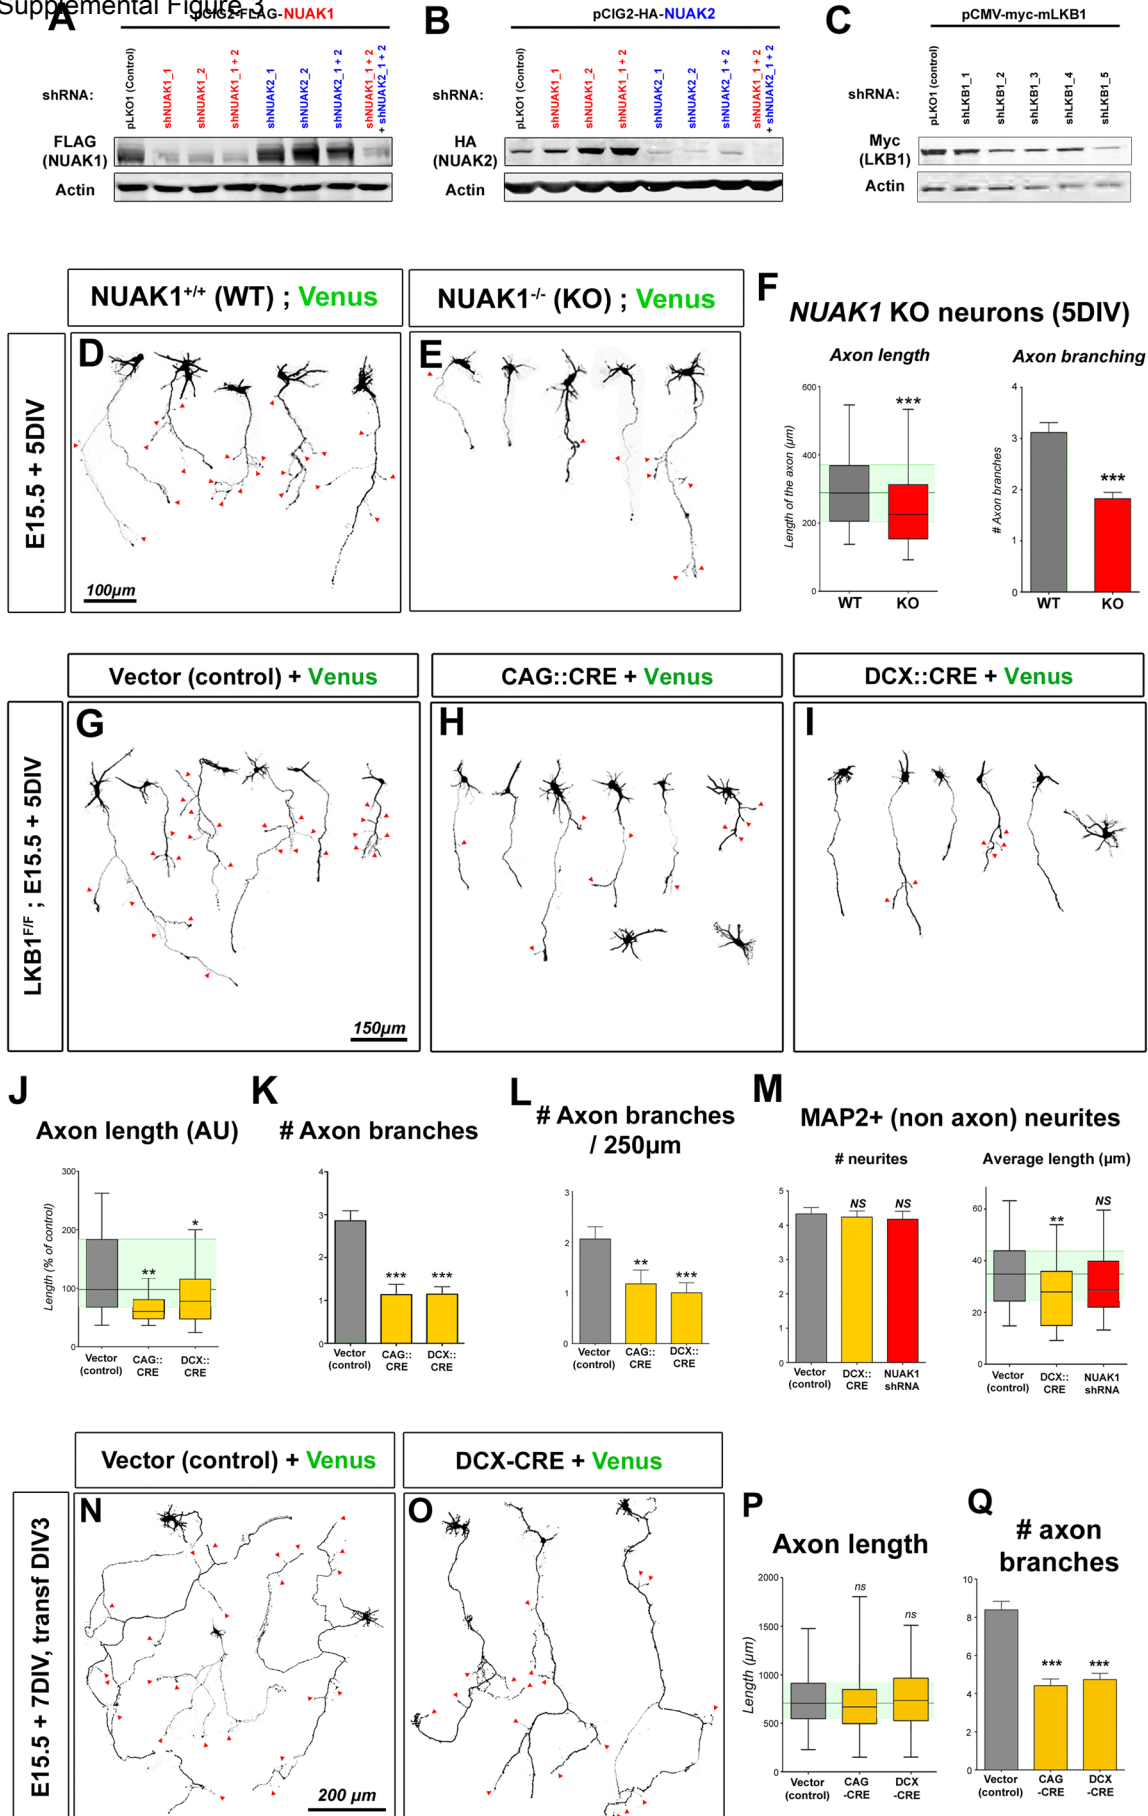

Figure S3  
Courchet, Lewis et al

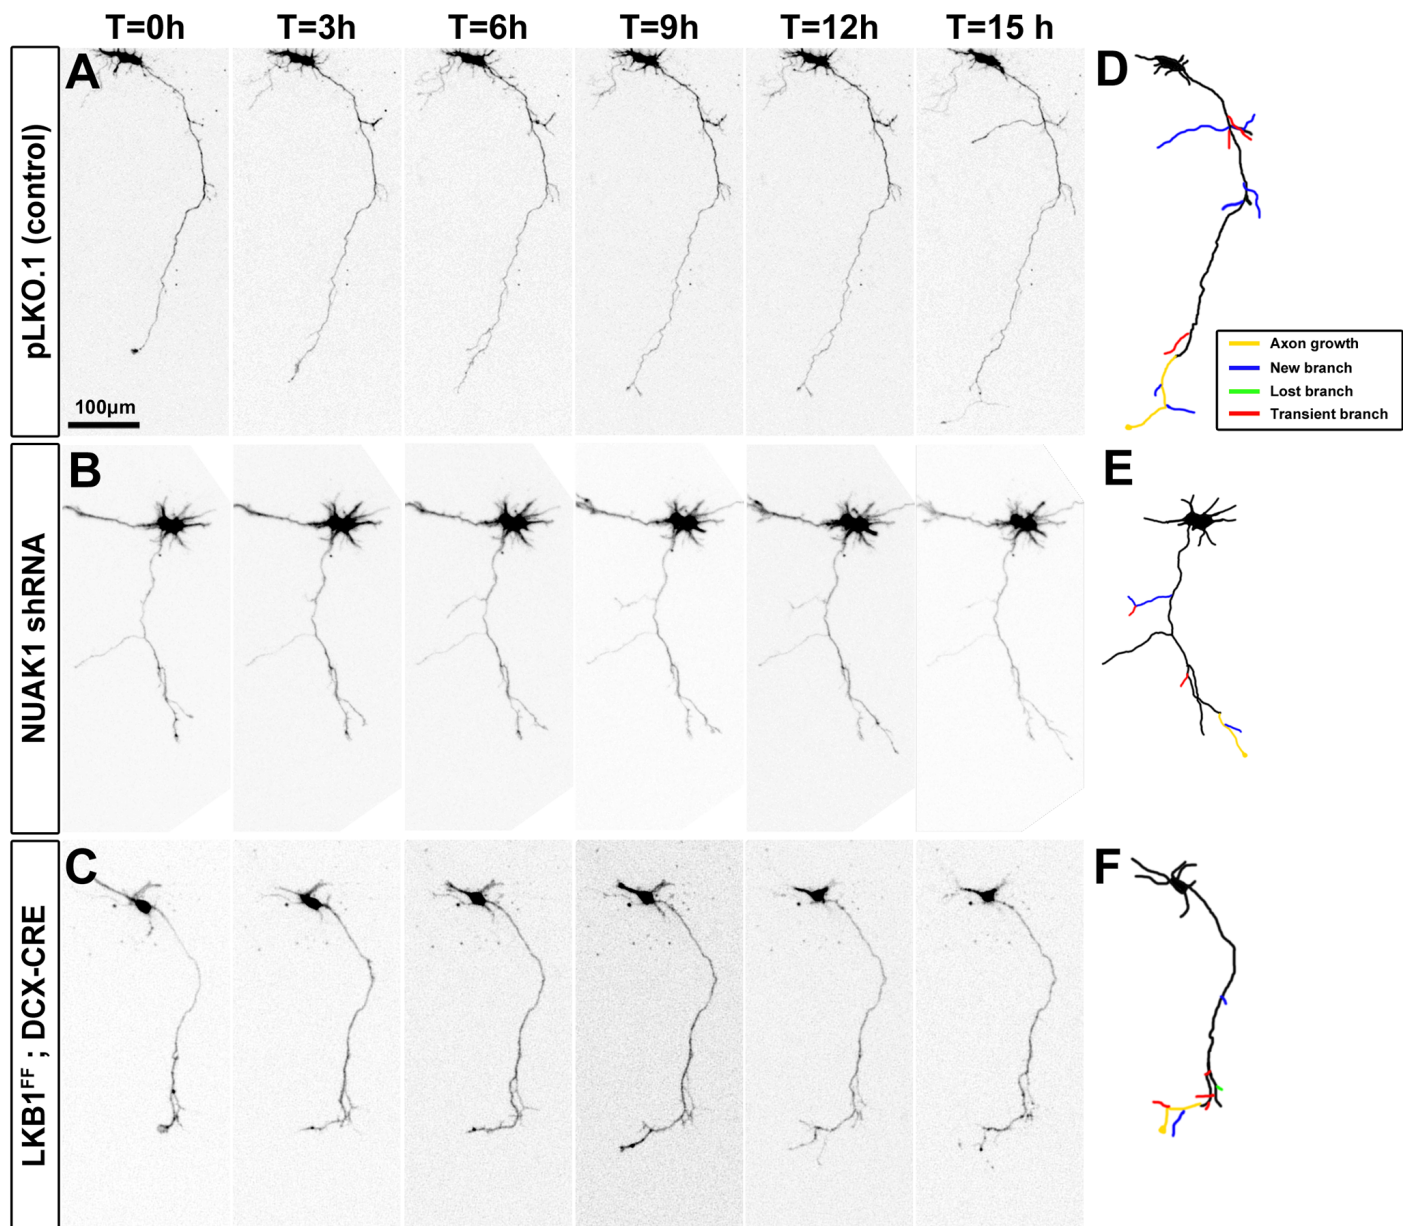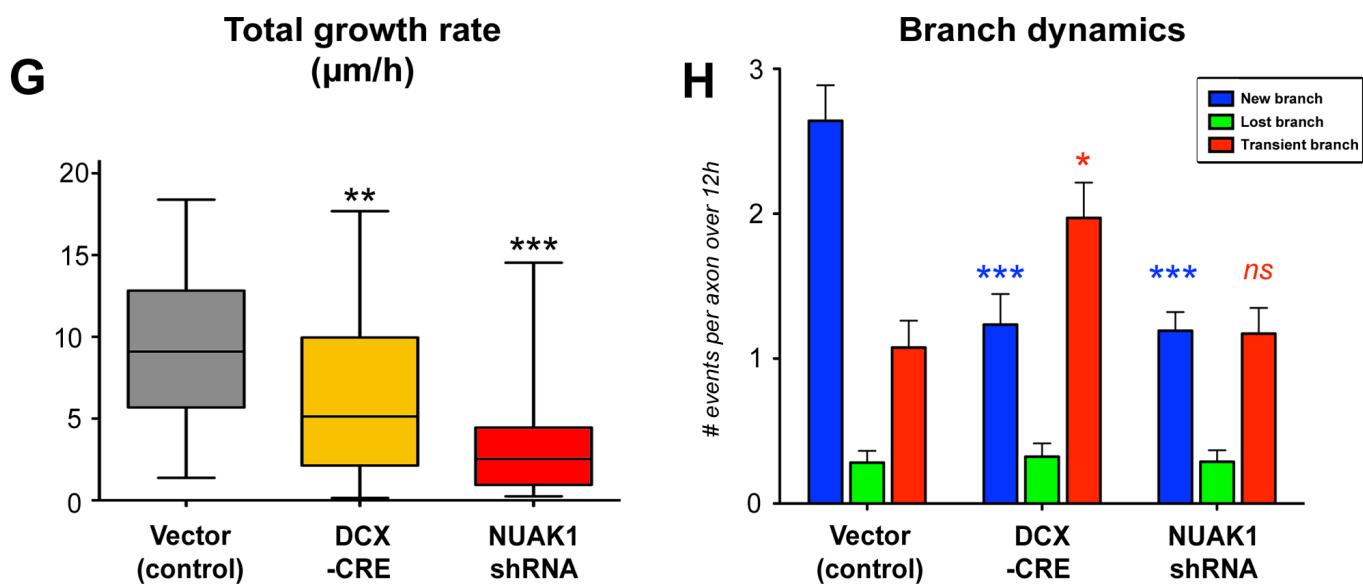

Figure S4  
Courchet, Lewis et al

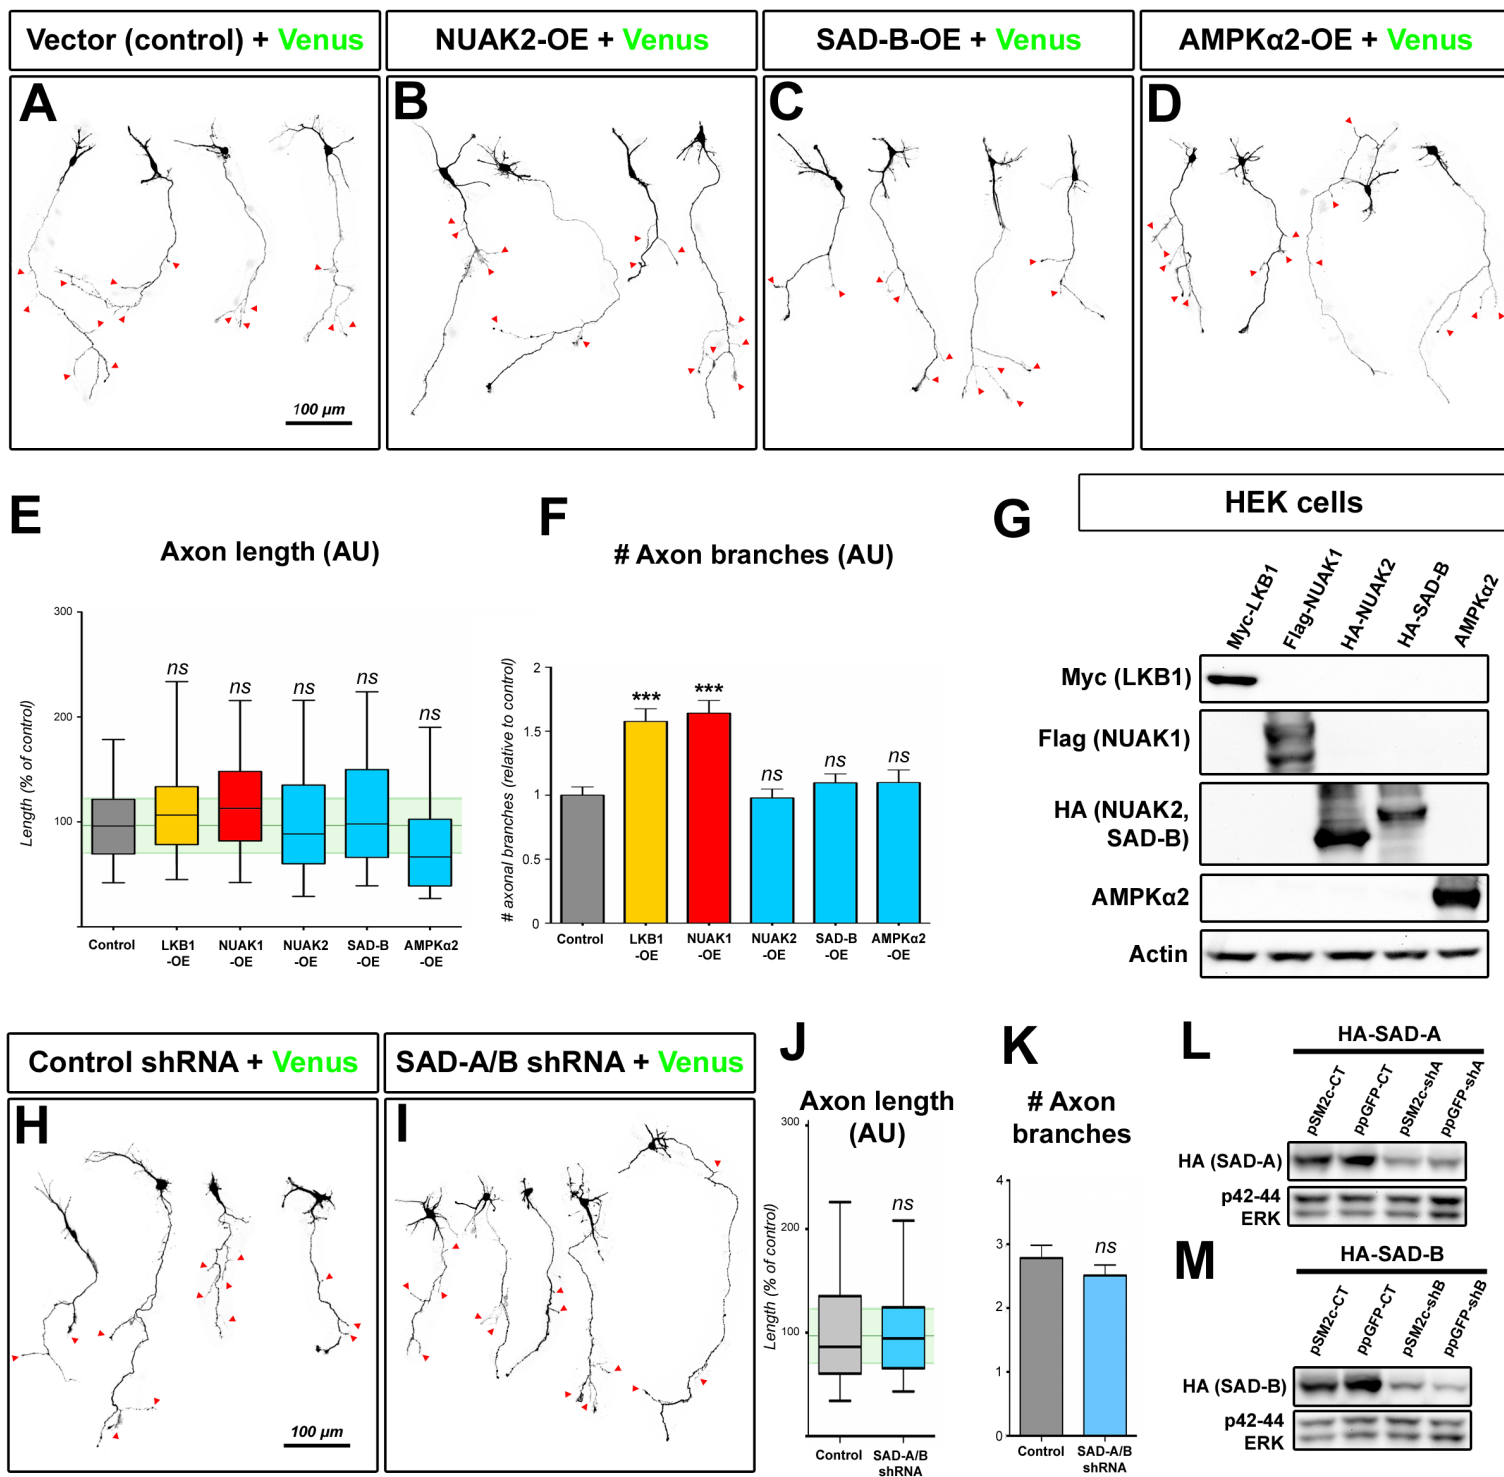

Figure S5  
Courchet, Lewis et al

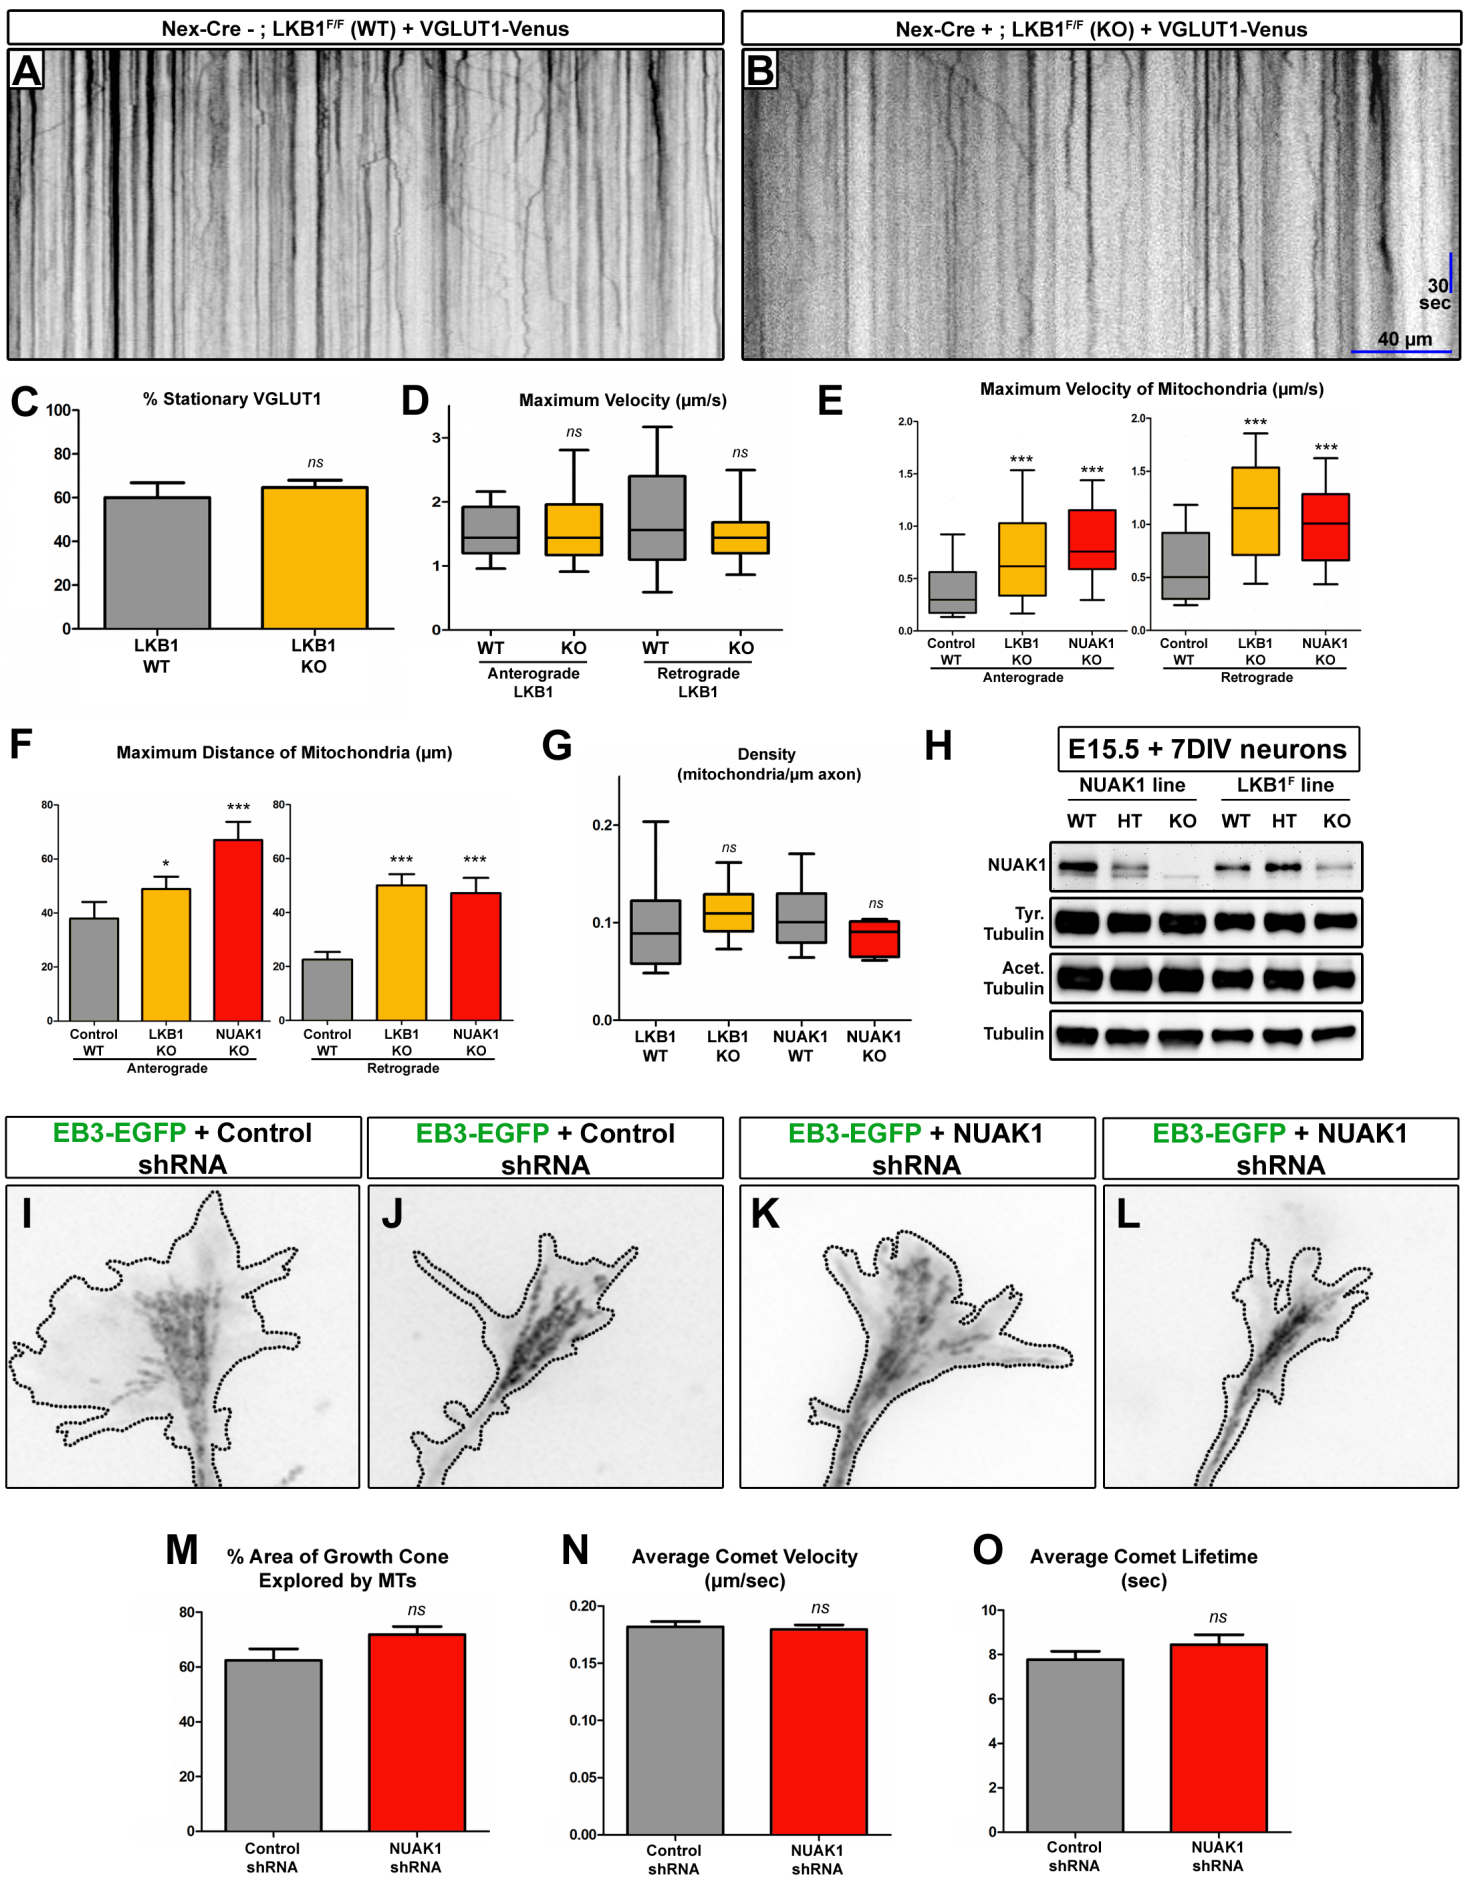

**Figure S6**  
Courchet, Lewis et al

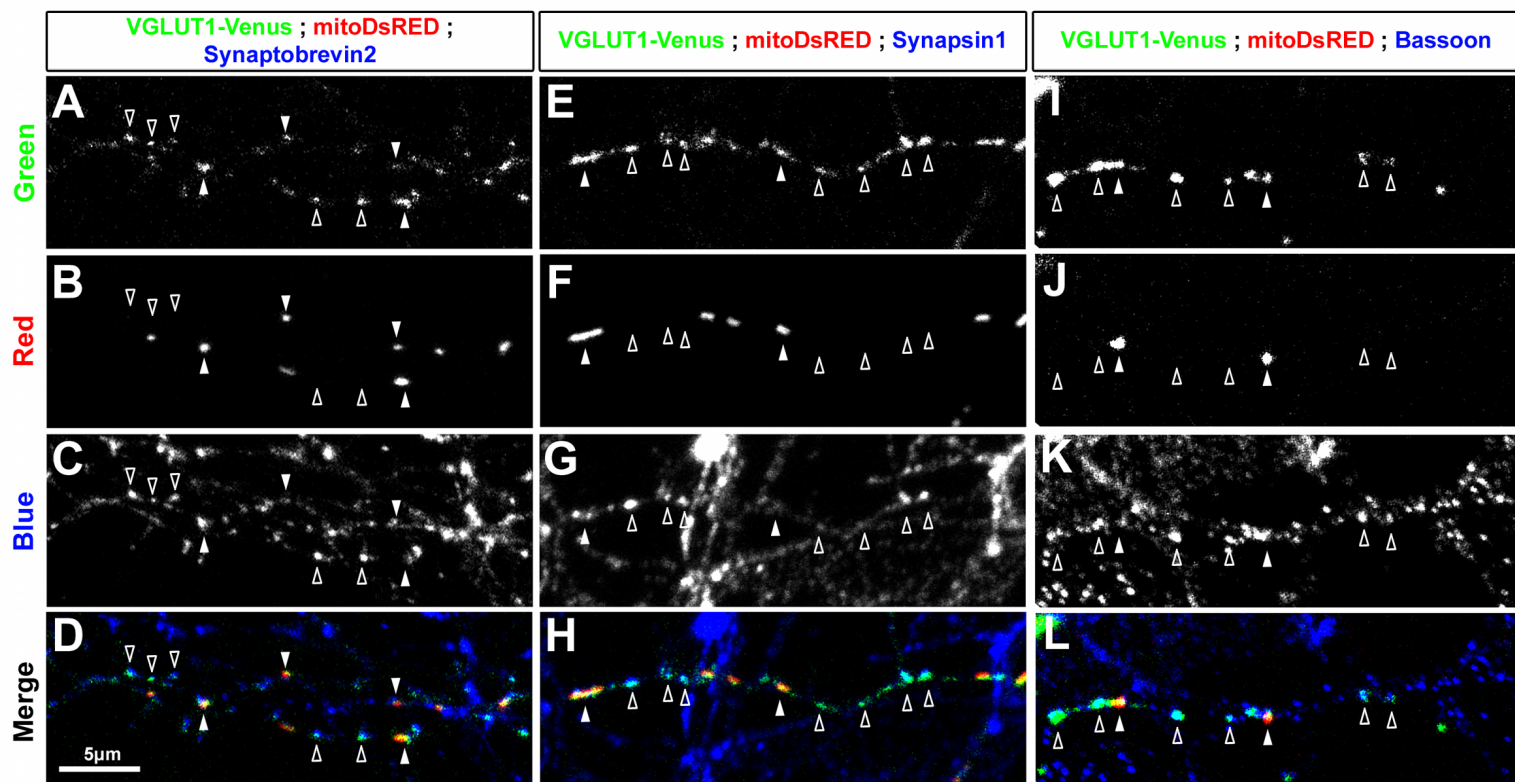

**Figure S7**  
Courchet, Lewis et al.
